# Supplementary material for: A low-cost cementite (Fe3C) nanocrystal@N-doped graphitic carbon electrocatalyst for efficient oxygen reduction
Source: Royal Society of Chemistry journal article supplement (doi:10.1039/c5cp04252f), 2015-01-01
Supplement: c5cp04252f1.pdf [file c5cp04252f1.pdf]

## Electronic Supplementary Information (ESI)

### **A Low-cost Cementite (Fe<sub>3</sub>C) Nanocrystals@N-doped Graphitic Carbon Electrocatalyst for Efficient Oxygen Reduction**

Tianxing Wu,<sup>a</sup> Haimin Zhang,<sup>\*,a</sup> Xian Zhang,<sup>a</sup> Yunxia Zhang,<sup>a</sup> Huijun Zhao<sup>a,b</sup> and  
Guozhong Wang<sup>\*,a</sup>

<sup>a</sup> Key Laboratory of Materials Physics, Centre for Environmental and Energy Nanomaterials, Anhui Key Laboratory of Nanomaterials and Nanostructures, Institute of Solid State Physics, Chinese Academy of Sciences, Hefei 230031, P. R. China. E-mail: [zhanghm@issp.ac.cn](mailto:zhanghm@issp.ac.cn), [gzhwang@issp.ac.cn](mailto:gzhwang@issp.ac.cn).

<sup>b</sup> Centre for Clean Environment and Energy, Gold Coast Campus, Griffith University, Queensland 4222, Australia.

**Table S1.** N<sub>2</sub> sorption-derived textural properties of the prepared carbon materials.

| Sample                | BET Surface Area<br>(m <sup>2</sup> g <sup>-1</sup> ) | Pore Volume<br>(cm <sup>3</sup> g <sup>-1</sup> ) | Pore Size<br>(nm) |
|-----------------------|-------------------------------------------------------|---------------------------------------------------|-------------------|
| CWMs-900              | 608.53                                                | 0.34                                              | 2.2               |
| Fe <sub>3</sub> C@NGC | 313.73                                                | 0.31                                              | 4.0               |

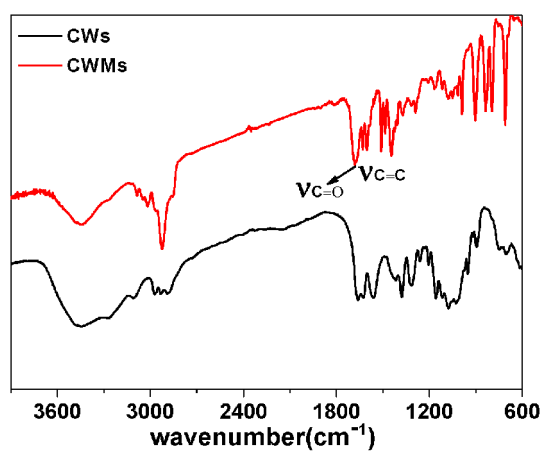

**Fig. S1** FT-IR spectra of chitosan whiskers (CWs) and chitosan whisker microspheres (CWMs).

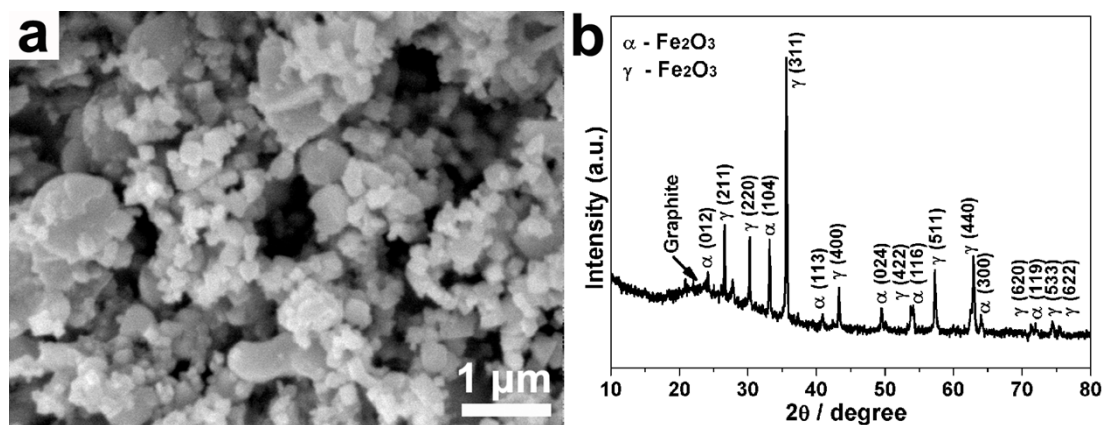

**Fig. S2** The SEM image (a) and XRD pattern (b) of samples obtained by pyrolyzing chitosan whiskers adsorbed Fe(acac)<sub>3</sub> at 900 °C in N<sub>2</sub> for 4 h.
